# Supplementary material for: Streptococcus mitis and S. oralis Lack a Requirement for CdsA, the Enzyme Required for Synthesis of Major Membrane Phospholipids in Bacteria
Source: PubMed Central journal article supplement (PMC5404519; doi:10.1128/aac.02552-16), 2017-04-24
Supplement: AAC.02552-16_zac005176127s1.pdf [file AAC.02552-16_zac005176127s1.pdf]

### 1643/HA04/HA14

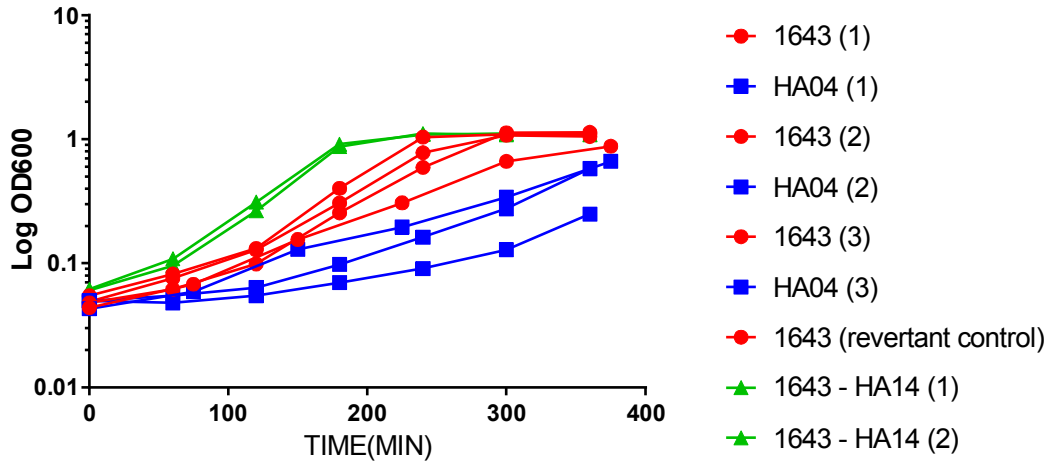

### 1647/HA06/HA16

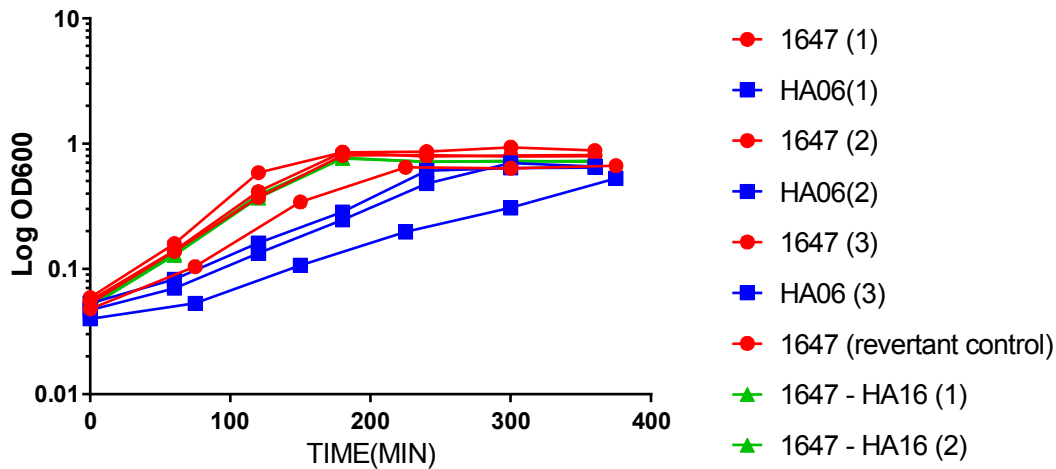

### 1648/HA08/HA18

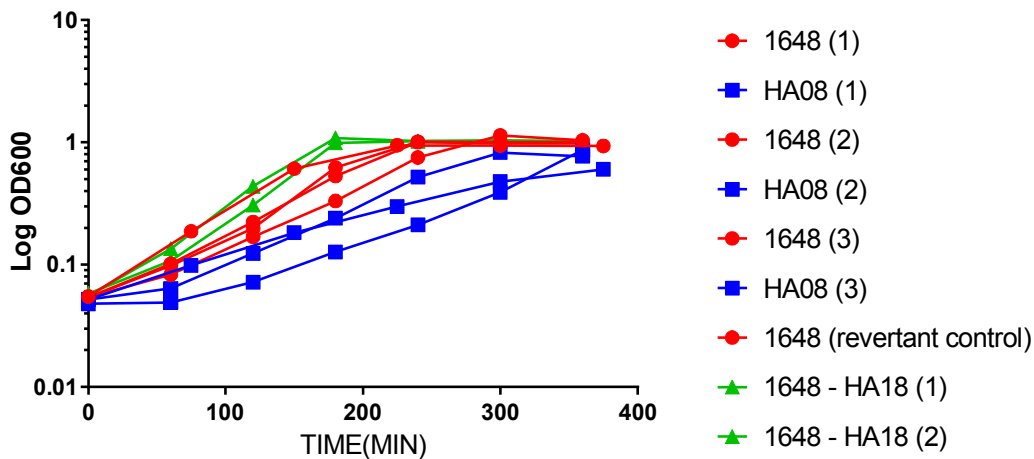

**Figure S1.** Growth curves for parental strains, their DAP<sup>R</sup> derivatives, and DAP<sup>S</sup> revertants. *S. mitis* 1643, DAP<sup>R</sup> derivative 1643-HA04, and DAP<sup>S</sup> revertant 1643-HA14 are displayed top; *S. oralis* 1647, DAP<sup>R</sup> derivative 1647-HA06, and DAP<sup>S</sup> revertant 1647-HA16 are displayed middle; *S. oralis* 1648, DAP<sup>R</sup> derivative 1648-HA08, and DAP<sup>S</sup> revertant 1648-HA18 are shown bottom. Red lines represent parental strains, blue lines represent resistant strains, and green lines represent revertant strains. Cultures were grown overnight in BHI and diluted to an OD<sub>600</sub> of 0.05 in fresh BHI. OD<sub>600</sub> readings were taken either every hour or every 75 minutes for six hours.

**Figure S2:** Representative negative ion ESI mass spectra of PG and CL species in a DAP sensitive/resistant strain pair.

**A)**

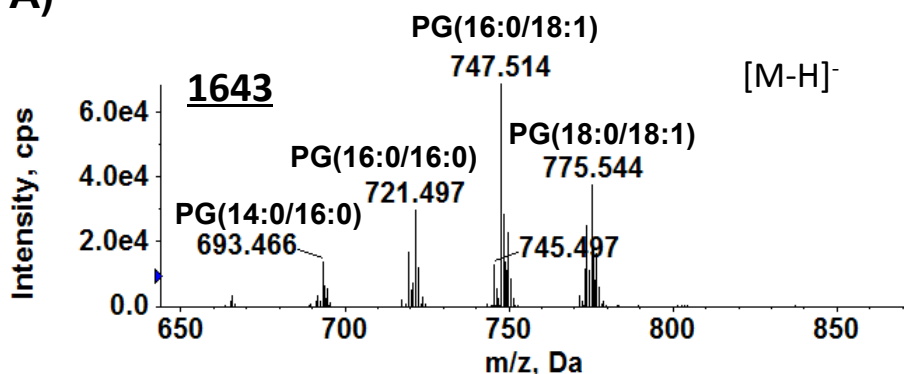

**C)**

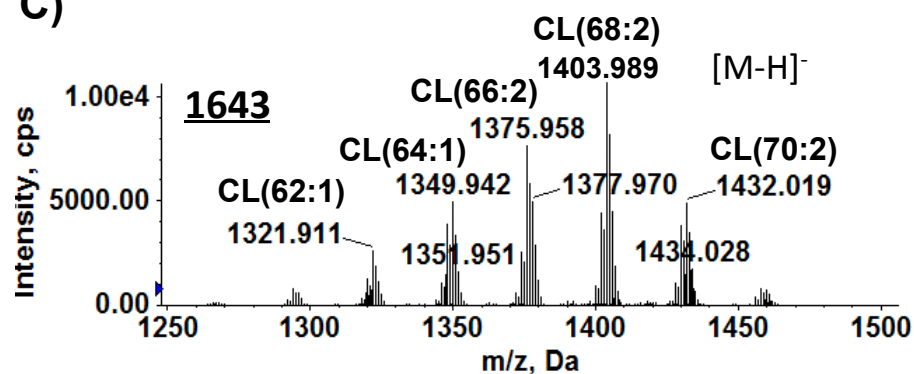

**B)**

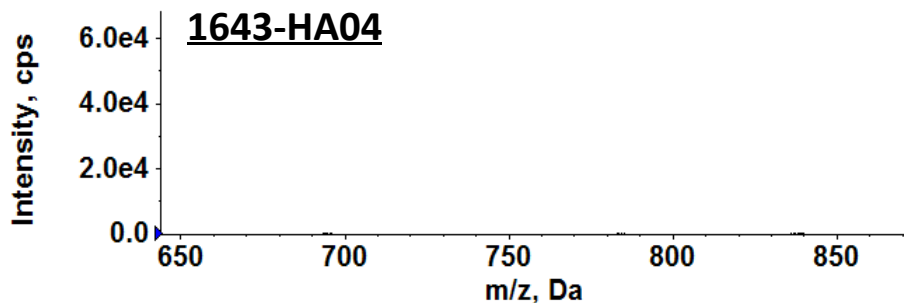

**D)**

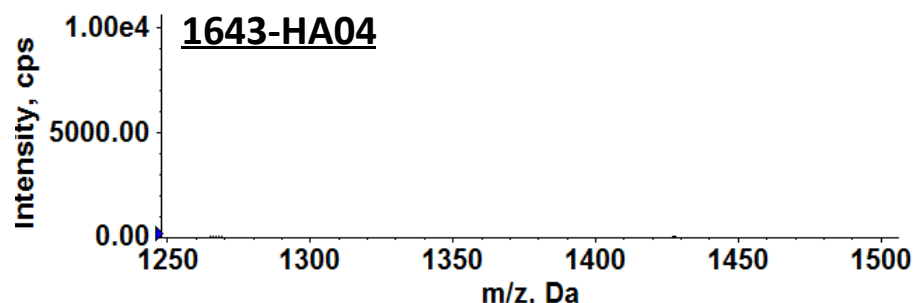

**A)****Figure S3*****S. mitis* 1643**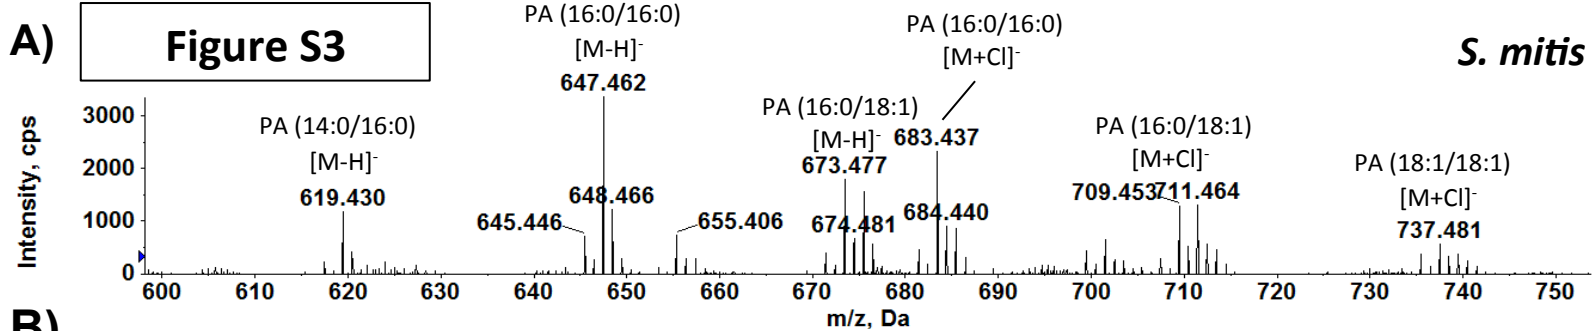**B)****1643-HA04**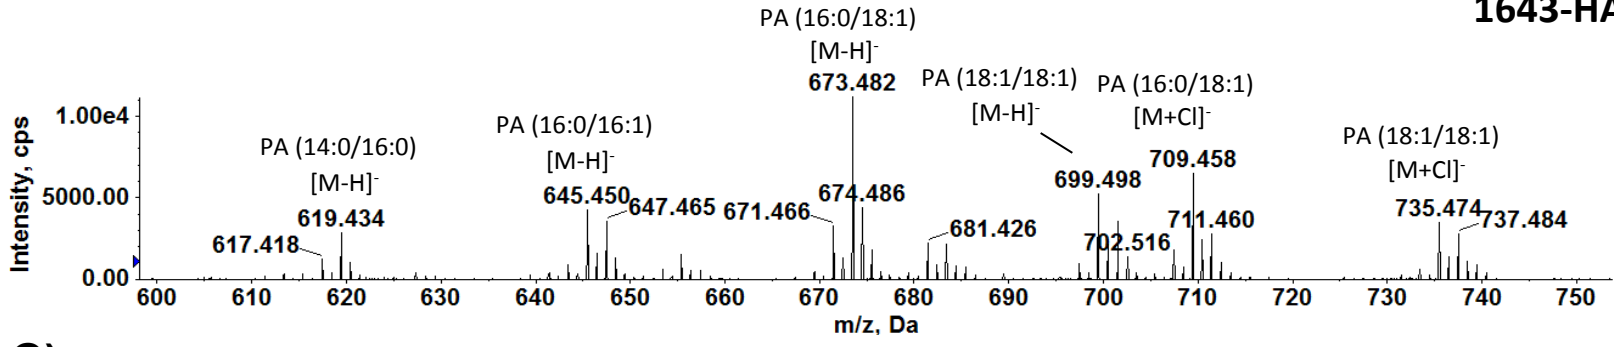**C)*****S. mitis* 1643**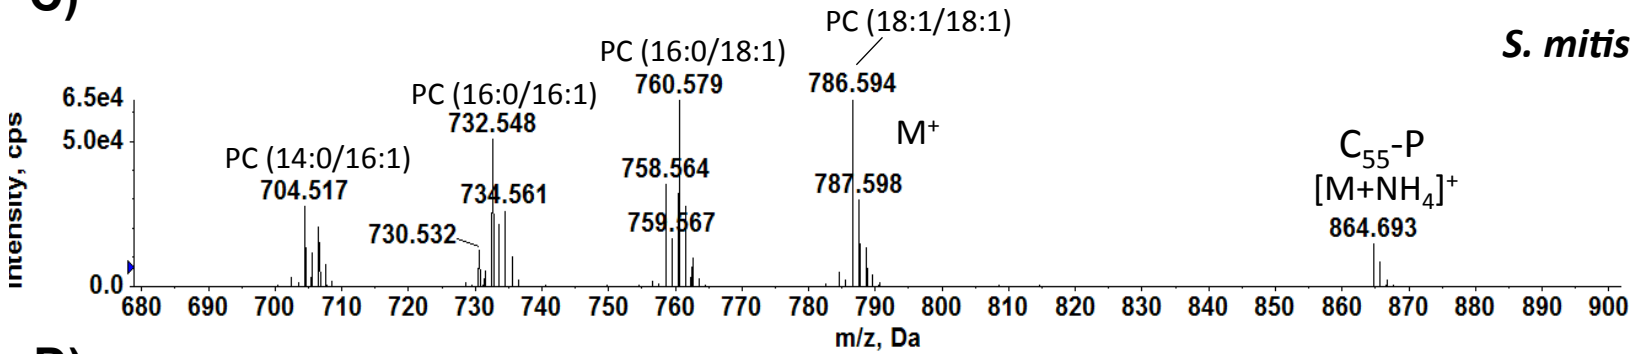**D)****1643-HA04**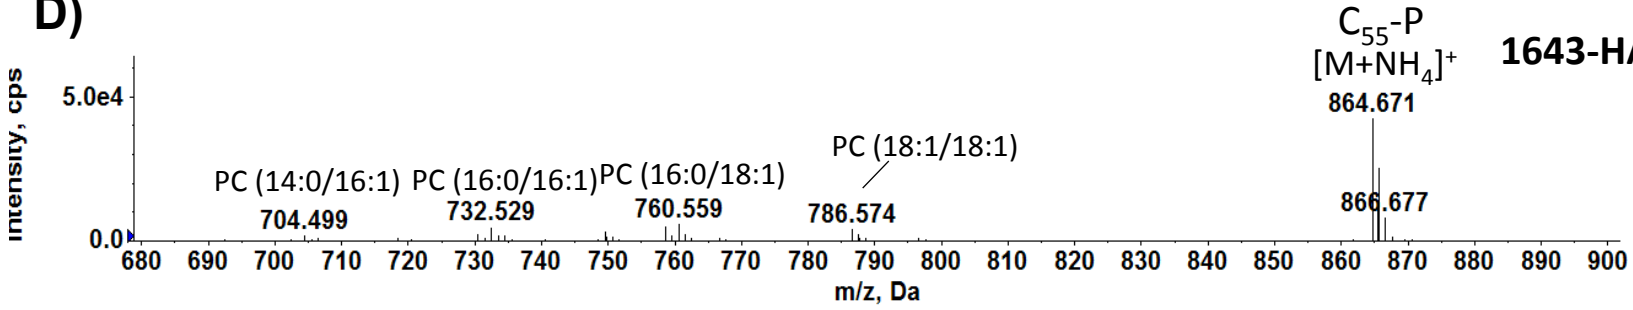

**Fig S3.** Mass spectra of PAs, PCs, and undecaprenyl phosphate ( $C_{55}$ -P) in (A), (C) DAP-sensitive and (B), (D) DAP-resistant strains. The mass spectra shown are averaged from spectra acquired by negative ion ESI/MS during the 20.2-21.2 min window. Both deprotonated  $[M-H]^-$  and chloride adduct  $[M+Cl]^-$  ions of PA are detected. The level of PC is significantly lower in the DAP-resistant strain compared to the parental DAP-sensitive strain.

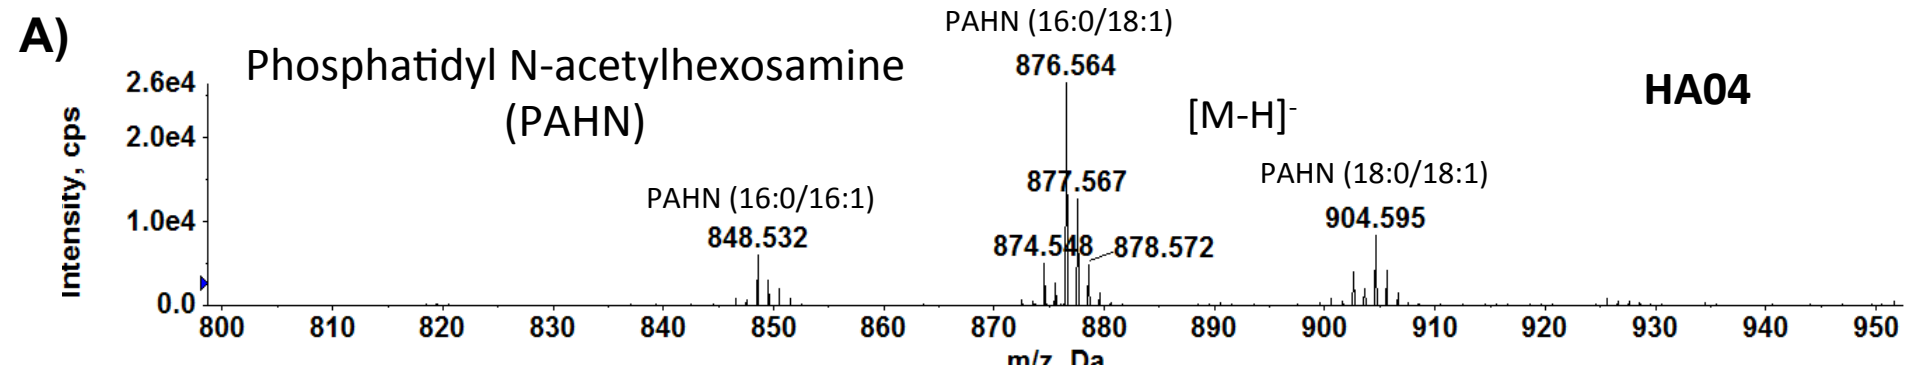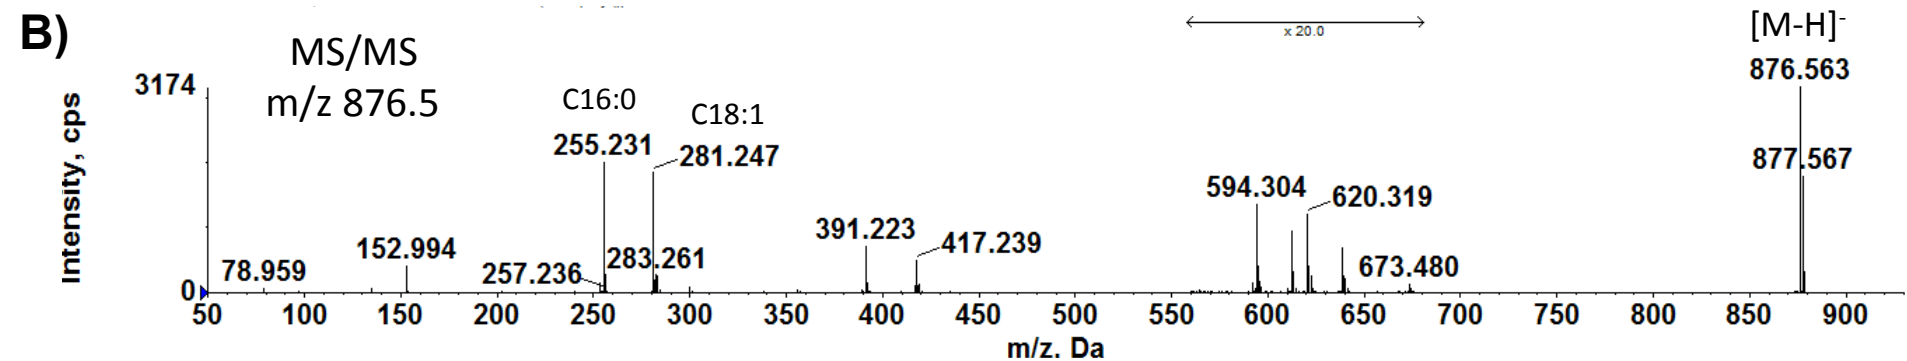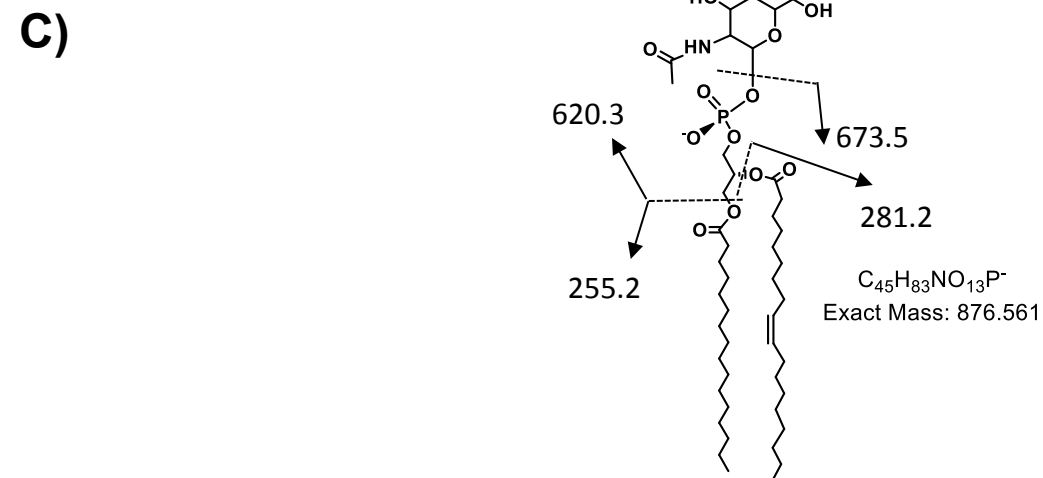

Fig S4. Identification of phosphatidyl N-acetylhexosamine (PAHN) from strain HA04.

Fig S4. Identification of phosphatidyl N-acetylhexosamine (PAHN) from strain HA04.

- A. Negative ion ESI mass spectrum showing the  $[M-H]^-$  ions of the PAHN molecular species emerging at 14.8-15.3 min.
- B. Collision-induced dissociation (CID) MS/MS spectrum of the  $[M-H]^-$  ion PAHN (16:0/18:1) at  $m/z$  876.5. The arrows indicating x20 reflect magnification of the product ion peaks in the corresponding region of the  $m/z$  values on the mass spectrum.
- C. Chemical structure of PAHN (16:0/18:1) and the fragmentation scheme for the observed product ions in B.

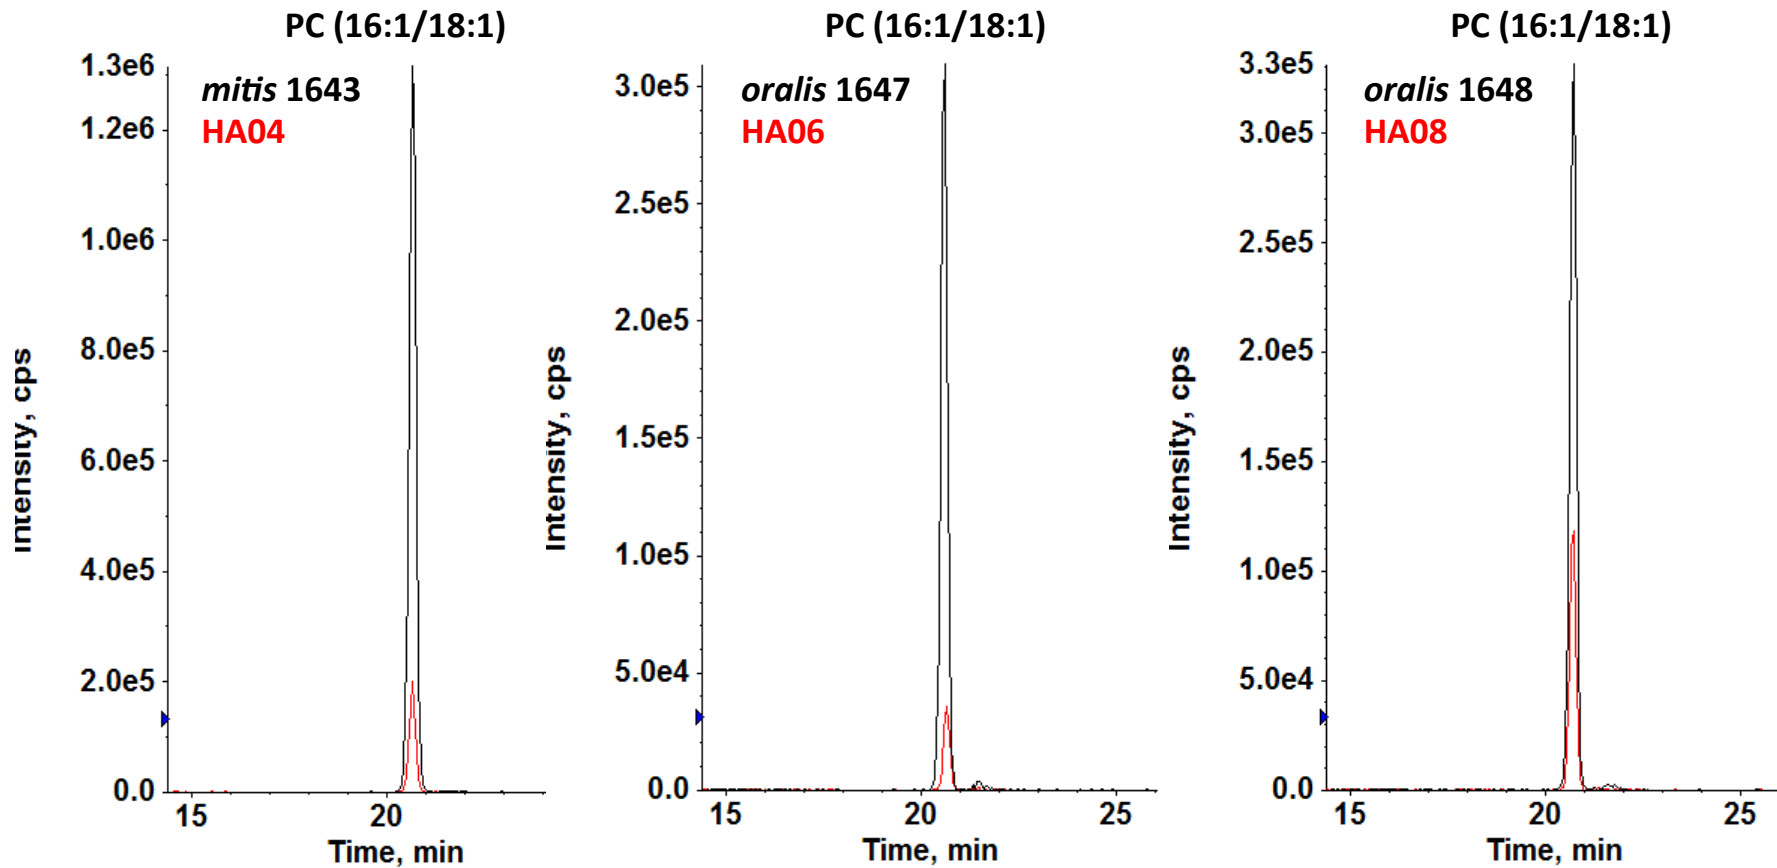

Fig S5. Comparison of the level of PC (16:1/18:1) in the DAP-resistant and DAP-sensitive pair strains. Extracted ion chromatograms of  $m/z$  758.5 for the  $M^+$  ion of PC (16:1/18:1), a major PC species in *S. mitis* 1643 (black) and *S. mitis* 1643-HA04 (red).

**Table S1. De novo assembly data for parental strains.**

| <b>Strain</b> | <b># reads</b> | <b># contigs</b> | <b>Min<br/>contig<br/>size</b> | <b>Max<br/>contig<br/>size</b> | <b>Average<br/>contig<br/>size</b> | <b>Contig<br/>N50 (bp)</b> | <b>Genome<br/>Size<br/>(Mbp)</b> |
|---------------|----------------|------------------|--------------------------------|--------------------------------|------------------------------------|----------------------------|----------------------------------|
| 1643          | 12,173,871     | 119              | 211                            | 253,142                        | 15,805                             | 66,153                     | 1,880,744                        |
| 1647          | 14,577,054     | 158              | 202                            | 224,156                        | 12,380                             | 53,890                     | 1,956,052                        |
| 1648          | 14,503,619     | 199              | 205                            | 153,663                        | 9,413                              | 48,229                     | 1,873,268                        |



**Table S2. Primers used in this study.**

| <b>Primer Name</b>      | <b>Sequence</b>       |
|-------------------------|-----------------------|
| 1643_IntGen_19_F        | CCAGTGTAACCTTTACTGCA  |
| 1643_IntGen_19_R        | CGAGCTGACTGAAGCAGAC   |
| 1643_CellWall_F         | GCCTGACTTAACTAATCTGG  |
| 1643_CellWall_R         | CCACGAAGTCGAATCGTTAC  |
| 1643_Hypothetical_F     | GGAGATTTAGAGGGGTGTC   |
| 1643_Hypothetical_R     | CGGAACTATATCCAATCTGTC |
| 1643_SerThr_Kinase_F    | GCGTCAGATAAGTGAAGTGG  |
| 1643_SerThr_Kinase_R    | CCCATCCACGAAGAAAACAT  |
| 1643_IntGen_32_F        | GTGCCGTCAGTTTTGACTTG  |
| 1643_IntGen_32_R        | GGACTACTGTAGCTGACAC   |
| 1643_Ribo_S5p_F         | GCCAGATGGCGTCAAAGT    |
| 1643_Ribo_S5p_R         | GGCTAGTGATGTCCGAGAG   |
| 1643_cdsA_F             | GCAATTGGGAAAGCGGCA    |
| 1643_cdsA_R             | CCGTACGAGTGGTGAGTTG   |
| 1647_IntGen_13_F        | GCTACAAAAGCGCAGGCTTG  |
| 1647_IntGen_13_R        | GGCTTACTATGGCTTTGAC   |
| 1647_DAG_Kinase_F       | CGGCTCCTGCCGCCATGT    |
| 1647_DAG_Kinase_R       | GCCTACATTGGGGAACTTTTC |
| 1647_IntGen_17_F        | CGAAATCAGATAGACTTGTC  |
| 1647_IntGen_17_R        | GATTTGGCTCTTTTACCATAC |
| 1647_cdsA_F             | GGGCCCCATACCAATGGC    |
| 1647_cdsA_R             | GCGCAGCCTACCTGACAG    |
| 1647_Ribo_Mtase_F       | CCAGCAGTCGCCTCATAG    |
| 1647_Ribo_Mtase_R       | GCCCTAAACACTGTGCCA    |
| 1647_ppGpp_Synthetase_F | GGACTATGCTACCGAACG    |
| 1647_ppGpp_Synthetase_R | CTCCTCCGCCAGATAGTT    |
| 1648_cdsA_F             | GAGGAAGGATTCTGAATGGT  |
| 1648_cdsA_R             | GGCTCCGAGAGTTTCTCC    |
| 1648_IntGen_27_F        | GCTCACCAATCCCAAACAC   |
| 1648_IntGen_27_R        | GGAACGCGTTCTCAGAAAG   |
| 1648_ppGpp_Synthetase_F | CCTCTGGGCCAACACCG     |
| 1648_ppGpp_Synthetase_R | GCAATCCAGTGCCGGGTG    |
| 1648_Ribo_S5U_Mtase_F   | CCAGTTGACTAGACTCGTC   |
| 1648_Ribo_S5U_Mtase_R   | CGAAGACAGAGATAAGCTAG  |
| 1648_Helicase_F         | GGAAGCATGGCTTTTAGGATG |
| 1648_Helicase_R         | CGTGAAGCGTTTCGTCTC    |
| Full_cdsA_F             | GGTTAGCAATCCAATCATTC  |
| Full_cdsA_R             | CCATCGCAATCGCCGTTTTG  |
| CdsA_promoter_F         | GCCTCCTAGAGGAAGGAT    |
| CdsA_promoter_R         | GGGACGGTATACTAGGTTC   |
| CdsA_Sequence_1         | GCCTTGCAGGAAGCTATTG   |

**Table S3. Major lipid species in wild-type, *cdsA* mutant, and revertant *S. mitis* detected by negative ion ESI/MS.**

| <b>Lipid class</b> | <b>[M – H]<sup>-</sup></b> | <b>Molecular species<sup>a</sup></b> | <b>WT</b> | <b>CdsA</b> | <b>Revertant</b> |
|--------------------|----------------------------|--------------------------------------|-----------|-------------|------------------|
| DAG                | 547.42 <sup>b</sup>        | DAG (26:0)                           | +         | +           | +                |
|                    | 573.43 <sup>b</sup>        | DAG (28:1)                           | +         | +           | +                |
|                    | 575.44 <sup>b</sup>        | DAG (28:0)                           | +         | +           | +                |
|                    | 601.46 <sup>b</sup>        | DAG (30:1)                           | +         | +           | +                |
|                    | 603.47 <sup>b</sup>        | DAG (30:0)                           | +         | +           | +                |
|                    | 627.47 <sup>b</sup>        | DAG (32:2)                           | +         | +           | +                |
|                    | 629.49 <sup>b</sup>        | DAG (32:1)                           | +         | +           | +                |
|                    | 657.52 <sup>b</sup>        | DAG (34:1)                           | +         | +           | +                |
|                    |                            |                                      |           |             |                  |
| FA                 | 225.19                     | FA (14:1)                            | +         | +           | +                |
|                    | 227.2                      | FA(14:0)                             | +         | +           | +                |
|                    | 253.22                     | FA (16:1)                            | +         | +           | +                |
|                    | 255.23                     | FA (16:0)                            | +         | +           | +                |
|                    | 281.25                     | FA (18:1)                            | +         | +           | +                |
|                    | 283.26                     | FA (18:0)                            | +         | +           | +                |
|                    |                            |                                      |           |             |                  |
| MHDAG              | 709.46 <sup>b</sup>        | MHDAG (26:0)                         | +         | +           | +                |
|                    | 735.48 <sup>b</sup>        | MHDAG (28:1)                         | +         | +           | +                |
|                    | 737.49 <sup>b</sup>        | MHDAG (28:0)                         | +         | +           | +                |
|                    | 763.50 <sup>b</sup>        | MHDAG (30:1)                         | +         | +           | +                |
|                    | 765.51 <sup>b</sup>        | MHDAG (30:0)                         | +         | +           | +                |
|                    | 791.54 <sup>b</sup>        | MHDAG (32:1)                         | +         | +           | +                |
|                    | 819.57 <sup>b</sup>        | MHDAG (34:1)                         | +         | +           | +                |
|                    |                            |                                      |           |             |                  |
| DHDAG              | 871.52 <sup>b</sup>        | DHDAG (26:0)                         | +         | +           | +                |
|                    | 897.53 <sup>b</sup>        | DHDAG (28:1)                         | +         | +           | +                |
|                    | 899.54 <sup>b</sup>        | DHDAG (28:0)                         | +         | +           | +                |
|                    | 925.56 <sup>b</sup>        | DHDAG (30:1)                         | +         | +           | +                |
|                    | 927.57 <sup>b</sup>        | DHDAG (30:0)                         | +         | +           | +                |
|                    | 953.58 <sup>b</sup>        | DHDAG (32:1)                         | +         | +           | +                |
|                    | 981.62 <sup>b</sup>        | DHDAG (34:1)                         | +         | +           | +                |
|                    |                            |                                      |           |             |                  |

|      |                     |                 |   |   |   |
|------|---------------------|-----------------|---|---|---|
| PG   | 693.47              | PG(14:0/16:0)   | + | — | + |
|      | 719.49              | PG(16:0/16:1)   | + | — | + |
|      | 721.5               | PG(16:0/16:0)   | + | — | + |
|      | 773.53              | PG(16:0/18:1)   | + | — | + |
|      | 775.54              | PG(18:0/18:1)   | + | — | + |
|      |                     |                 |   |   |   |
| CL   | 1321.91             | CL(62:1)        | + | — | + |
|      | 1349.94             | CL(64:1)        | + | — | + |
|      | 1375.96             | CL(66:2)        | + | — | + |
|      | 1403.99             | CL(68:2)        | + | — | + |
|      | 1432.02             | CL(70:2)        | + | — | + |
|      |                     |                 |   |   |   |
| PAHN | 848.53              | PAHN(16:0/16:1) | + | + | + |
|      | 874.55              | PAHN(16:1/18:1) | + | + | + |
|      | 876.56              | PAHN(16:0/18:1) | + | + | + |
|      | 902.58              | PAHN(18:1/18:1) | + | + | + |
|      | 904.6               | PAHN(18:0/18:1) | + | + | + |
|      |                     |                 |   |   |   |
| PA   | 619.43              | PA(14:0/16:0)   | + | + | + |
|      | 645.45              | PA(16:0/16:1)   | + | + | + |
|      | 647.46              | PA(16:0/16:0)   | + | + | + |
|      | 673.48              | PA(16:0/18:1)   | + | + | + |
|      | 699.49              | PA(18:1/18:1)   | + | + | + |
|      | 701.50              | PA(18:0/18:1)   | + | + | + |
|      |                     |                 |   |   |   |
| PC   | 740.50 <sup>b</sup> | PC(14:0/16:0)   | + | + | + |
|      | 766.51 <sup>b</sup> | PC(16:0/16:1)   | + | + | + |
|      | 792.53 <sup>b</sup> | PC(16:1/18:1)   | + | + | + |
|      | 794.54 <sup>b</sup> | PC(16:0/18:1)   | + | + | + |
|      | 820.56 <sup>b</sup> | PC(18:1/18:1)   | + | + | + |

<sup>a</sup>The individual or total numbers of acyl chain carbon atoms and double bonds are shown in parentheses.

<sup>b</sup>DAG, MHDAG, DHDAG, and PC values are for the [M + Cl]<sup>-</sup> ions.

Abbreviations: WT, *S. mitis* 1643; CdsA, *S. mitis* 1643-HA04; Revertant, *S. mitis* 1643-HA14; DAG, diacylglycerol; MHDAG, monohexosyldiacylglycerol; DHDAG, dihexosyldiacylglycerol; FA, fatty acid; CL, cardiolipin; PA, phosphatidic acid; PAHN, phosphatidyl N-acetylhexosamine; PE, phosphatidylethanolamine; PG, phosphatidylglycerol; PC, phosphatidylcholine.

**Table S4.** Mutations in *cdsA* identified in daptomycin spontaneous resistance experiments.

| <b>Strain ID</b> | <b>Nucleotide Change</b> | <b>Amino Acid Change</b> |
|------------------|--------------------------|--------------------------|
| LJ35             | G35A                     | A12E                     |
| LJ39             | T264A                    | Y88*                     |
| LJ310            | T264A                    | Y88*                     |
| LJ311            | T264A                    | Y88*                     |
| LJ713            | C351A                    | S117R                    |
| LJ72             | G361T                    | G121C                    |
| LJ76             | G361T                    | G121C                    |
| LJ313            | T366del                  | F122fs                   |
| LJ510            | G394-T645del             | V132-S215 del            |
| LJ72             | G421A                    | A141T                    |
| LJ54             | T428-T695del             | F143-F232delfs           |
| LJ34             | T431ins                  | I144fs                   |
| LJ56             | G445A                    | D149N                    |
| LJ514            | C450G                    | S150R                    |
| LJ714            | C455T                    | A152V                    |
| LJ76             | C459G                    | Y153*                    |
| LJ52             | A481T                    | R161*                    |
| LJ53             | A499T                    | R167*                    |
| LJ31             | C506T                    | S169F                    |
| LJ51             | C506T                    | S169F                    |
| LJ712            | G516C                    | K172N                    |
| LJ33             | G527C                    | G176A                    |
| LJ37             | G527C                    | G176A                    |
| LJ711            | T531del                  | F177fs                   |
| LJ32             | C551A                    | A184E                    |
| LJ59             | C551A                    | A184E                    |
| LJ36             | G679C                    | A227P                    |
| LJ512            | C688T                    | R230C                    |
| LJ312            | A731C                    | H244P                    |
| LJ314            | A731C                    | H244P                    |
| LJ55             | G734T                    | G245V                    |

**S. mitis 1643/RA04**

>1643\_Hypothetical

MTTKNYFIRSFNLLYLVLSTPICSVFGWLFNFLSVQLANISFVNLDVKNITDTISSVSHKSALISL  
LLALLLTGLEIIQRLKTDLSLRNYIQSVYHTFLLRHFLFQRERVQKISNLEHQTVTTINPIHKGFNRA  
VRKCIDIRKDTITIFLKVPRDQQGQKILKEMEAQLKEEIVSQHADYFSSPIRVRNQLWFTGQK  
R

>HA04\_Hypothetical

MTTKNYFIRSFNLLYLVLSTPICSVFGWLFNFLSVQLANISFVNLDVKNITDTISSVSHKSALISL  
LLALLLTGLEIIQRLKTDLSLRNYIQSVYHTFLLRHFLFQRERVQKISNLEHQTVTTINPIHKGFNRA  
VRKCIDIRKDTITIFLKVPRDQQGQKILKEMEAQLKEEIVRQHADYFSSPIRVRNQLWFTGQK  
R

>1643\_Ser\_Thr\_Kinase

MINSDFYKRLAKIFCGDETELFTYKSGSQLVFFNTHFHTQDSYGQGFPTRWIYVNDKLLDFSS  
RGIINSFFNLILSKQYLLTERQISEVDAIEHQKIIINELDKICSVYSLKLSRKGNEFYLVIEDLDLVEI  
GKGGFADIYFQKSTGLVVKKLNEESVRRQSLRSRLKREYEITKSCSDIESIIRVDFDFDSSNCSYT  
MEKADDTLGNIEASELTEDSKLNILRQILYTM SLVHQRDVLHRDLSPTNVFFVDGIIKIADFG LG  
KNLNTLTSHQTM DTT SFGQLFYCAPEQLSLLKDADKRSDVYSLGRIINFVMTKNPNIFSHSLRSV  
SEKATNLEPDYRYQDATEMLNALNAWLSIRSGETFKKTIWEKIDHGIFDDDIENYIYEMTARELC  
RACIKKSDVFIESLMVFMKLD DAHSIYIIQTIHSNYEQYLKRFEDADPFASLSYRILKGQFSFNVKE  
VAAQILHYVAYEVGRFSAQRKVDNLIENGIEPLIESILER

>HA04\_Ser\_Thr\_Kinase

MINSDFYKRLAKIFCGDETELFTYKSGSQLVFFNTHFHTQDSYGQGFPTRWIYVNDKLLDFSS  
RGIINSFFNLILSKQYLLTERQISEVDAIEHQKIIINELDKICSVYSLKLSRKGNEFYLVIEDLDLVEI  
GKGGFADIYFQKSTGLVVKKLNEESVRRQSLRSRLKREYEITQSCSDIESIIRVDFDFDSSNCSYT  
MEKADDTLGNIEASELTEDSKLNILRQILYTM SLVHQRDVLHRDLSPTNVFFVDGIIKIADFG LG  
KNLNTLTSHQTM DTT SFGQLFYCAPEQLSLLKDADKRSDVYSLGRIINFVMTKNPNIFSHSLRSV  
SEKATNLEPDYRYQDATEMLNALNAWLSIRSGETFKKTIWEKIDHGIFDDDIENYIYEMTARELC  
RACIKKSDVFIESLMVFMKLD DAHSIYIIQTIHSNYEQYLKRFEDADPFASLSYRILKGQFSFNVKE  
VAAQILHYVAYEVGRFSAQRKVDNLIENGIEPLIESILER

>1643\_Ribosomal\_alanineacyltransferase

MSLEELWQLFPFI FLVEHKSEWKD WYESEKTS LKKILGANVIKRIEHIGSTAIPNIWAKNIVDILLEV  
GRIEDLARVRDLLVKN GWLVMSESPNRISLNKGYTEQGFAENVFHLHLRMTGDHDEIYFRDYL  
CQHPDIAQAYQELKLSLWKQFEHNRDAYTDAKTD FINHYVSEAKSSNFQESEKCHQKTLDRRK  
N

>HA04\_Ribosomal\_alanineacyltransferase

MSLEELWQLFPFI FLVEHKSEWKD WYESEKTS LKKILGANVIKRIEHIGSTAIPNIWAKNIVDILLEV  
GRIEDLARVRDLLVKN GWLVMSESPNRISLNKGYTEQGFAENVFHLHLRMTGDHDEIYFRDYL  
CQHPDIAQAYQELKLSLWKQFEHNRDAYTDAKTD FINHYVSEAKSSNFQESEKCHQKTLDRRK  
N

>1643\_cdsA

MTKDLQKRTLFAVLALAIFLPVLFAGGLLLQIGIGLLAMLGVHELLHMKGLKTMIEGALTLFATFA  
LTVPLENYLTFPLVDGNVVAYSVLITIMLGTTVFSKNYTIEDAAFPIAVSFYVGFNFNALLDARVA  
GFDKVLALLFIVWATDSAAYLTGMNFGKHLAPRVSPNKSIEGFVGGILGAVLITVIFMLVDSTVA  
LPYGIYRMSLFAAFFSVAGQFGDLIESAMKRHFVVKDSGKFIPGHGGVLDLRFDSMLIVFPMHL  
FGLF

>HA04\_cdsA

MTKDLQKRTLFAVLALAIFLPVLFAGGLLL\*

### ***S. oralis* 1647/RA06**

>1647\_cdsA

MTKDLQKRTLFAVLALAIFLPVLFAGGLLLQIGIGLLAMLGVHELLHMKGLKTMIEGALTLFATFA  
LTVPLENYLTFPLVDGNVVAYSVLITIMLGTTVFSKNYTIEDAAFPIAVSFYVGFNFNALLDARVA  
GFDKVLALLFIVWATDSAAYLTGMNFGKHLAPRVSPNKSIEGFVGGILGAVLITVIFMLVDSTVA  
LPYGIYRMSLFAAFFSVAGQFGDLIESAMKRHFVVKDSGKFIPGHGGVLDLRFDSMLIVFPMHL  
FGLF

>HA06\_cdsA

MTKDLQKRTLFAVLALAIFLPVLFAGGLLLQIGIGLLAMLGVHELLHMKGLKTMIEGALTLFATFA  
LTVPLENYLTFPLVDGNVVAYSVLITIMLGTTVFSKNYTIEDAAFPIAVSFYVGFNFNALLDARVA  
GFDKVLALLFIVWATDSAAYLTGMNFGKHLAPRVSPNKSIEGFVGGILGAVLITVIFMLVDSTVA  
LPYGIYRMSLFAAFFSVAGQFGDLIESAMKRHFVVKDSGKFIPGHGGVLDLRFDSMLIVFPMHL  
FGLF

>1647\_Intergenic\_Contig\_13

TTATTTCTTTGACTGTGTTTCTTCTTTCTTTGTACGTGCCAATCGAAGAGCGCGTTTTAGGATT  
GAGACGATTAATAATTCTTCTAGTTTCTTTTCATTCCATACATCTGCTGCAGAAACAAAATT  
GCCATCTGCATCTCGGAATGATATCGGTTTATCTCCCATATCAATCTCCTAGTCTACAAATT  
CAAATTCAAATTTACCAATGCGGACCAAATCGCCATCTTTGGCGCCACGCGCACGAAGGG  
CTTCGTCAACTCCCATACCACGAAGCTGACGGGCAAACCTTCATGACCGATTTCGTCACGGTC  
AAAGTTGGTCATGTTAAAGAGTTTCATGAGTTTTTACCAGAAAGTACCCATGTGCGCATCAT  
CATCACGACTAATCTCAAAGGCTTTTTCTTCTCGTCAAAGCCATAGTAAGCCTCTTCTTCC  
ATATCGGATTCATCATAAATCGGGAATTCTGGAGTCTTGTCTAACAATTGAGCTGTGCGCATC  
CAAAGAGTTGCCAAACCTTGCTTGGTCAATCCAGAAATTGGGAAGATGGCTGGAAGTTCC  
TCAAACCTCGTCGTAGTTTGGCTGCCAACTTTTCTTGAAGTTTTTTCAGATTTTCTGACTTTCA  
GGCATATCCATCTTGTGGCCACGATAATCTGTGGACGTTCCATGAGACGAAGTTGTAGG  
ATTCTAATTCCTTATTGATAGCAAGGTAGTCCTCATAAAGGATCACGTCCTTCACTAGCTGAC  
ATATCGATGACATGGAGGATAACTCGAGTGC GTTCGATATGACGAAGAACTGGGTTCCAA  
GACCAACCCCTTGACTGGCCCTTCAATCAAACCTGGAAGGTCTGCTACTGCAAAGATTC  
ACCTGACTGTGTACGAACCATAACCAAATTTGGGACAATCGTCGTAAAGTGGTAAGCACCG  
ATTTTGGGCTTAGCTGAAGTGATGACACTAAGCAAAGTTGATTTTCCAACAGATGGGAAAC  
CGACCAAGCCAACATCCGCTAAGATTTCAATTCAGTTGCAACTCGCGTTCTTGTCTCTGG

TTCTCCATTCTCAGAGATTTTCAGGTGCAGGATTTTTGGGAGTGGCAAACGGATATTTCCA  
CGACCACCTCGACCGCCATGAGCCACGATAAATTCCTGACCATGTTCAATCAAGTCTGTAA  
TGACTTTGCCAGTTTCTGCATCACGTACAGTAGTCCCCTGTGGCACGCGAACACGTAGATC  
TTCTGCACCACGTCCGTGCATTCTTTGGTCATTCTTTTTACCGGAATCAGCCTTGAAAT  
GACGGTTATAGCGGAAATCCATCAAGGTACGTAAGCCTTCGTCTACCACGAAAACAACGTT  
ACCTCCACGTCCACCATCACCAACCCCAAGGACCGCCATTAGGGACATATTTTTACGGCGA  
AAGGCAACCATGCCATCGCCACCATTACCAGCCTTGACCTTAATCTTGGCTGTATCTAAAA  
ACAT

>HA06\_Intergenic\_Contig\_13

TTATTTCTTTGACTGTGTTTCTTCTTTCTTTGTACGTGCCAATCGAAGAGCGCGTTTAGGATT  
GAGACGATTAATAATTCTTCTAGTTTCTTTTCATTCCATACATCTGCTGCAGAAACAAAATT  
GCCATCTGCATCTCGGAATGATATCGGTTTATCTCCCATATCAATTTCTAGTCTACAAATT  
CAAATTCAAATTTACCAATGCGGACCAAATCGCCATCTTTGGCGCCACGCGCACGAAGGG  
CTTCGTCAACTCCCATACCACGAAGCTGACGGGCAAACCTTCATGACCGATTTCGTACGGTC  
AAAGTTGGTCATGTTAAAGAGTTTCATGAGTTTTTACCAGAAAGTACCCATGTGCGCATCAT  
CATCACGACTAATCTCAAAGGCTTTTTCTTCTCGTCAAAGCCATAGTAAGCCTCTTCTTCC  
ATATCGGATTCATCATAAATCGGGAATTCTGGAGTCTTGTCTAACAATTCAGCTGTGCGATC  
CAAAGAGTTGCCAAACCTTGCTTGGTCAATCCAGAAATTGGGAAGATGGCTGGAAGTTCC  
TCAAACCTCGTCGTAGTTTGTGCTGCCAACTTTTCTTGAAGTTTTTTCAGATTTTCTGACTTTCA  
GGCATATCCATCTTGTTGGCCACGATAATCTGTGGACGTTCCATGAGACGAAGGTTGTAGG  
ATTCTAATTCCTTATTGATAGCAAGGTAGTCCTCATAAGGATCACGTCCTTCACTAGCTGAC  
ATATCGATGACATGGAGGATAACTCGAGTGCCTTCGATATGACGAAGAACTGGGTTCCAA  
GACCAACCCCTTGACTGGCCCTTCAATCAAACCTGGAAGGTCTGCTACTGCAAAGATTC  
ACCTGACTGTGTACGAACCATAACCAAAATTTGGGACAATCGTCGTAAAGTGGTAAGCACCG  
ATTTTGGGCTTAGCTGAAGTGATGACACTAAGCAAAGTTGATTTTCCAACAGATGGGAAAC  
CGACCAAGCCAACATCCGCTAAGATTTTCAATTCAGTTGCAACTCGCGTTCTTGTCTGG  
TTCTCCATTCTCAGAGATTTTCAGGTGCAGGATTTTTGGGAGTGGCAAACGGATATTTCCA  
CGACCACCTCGACCGCCATGAGCCACGATAAATTCCTGACCATGTTCAATCAAGTCTGTAA  
TGACTTTGCCAGTTTCTGCATCACGTACAGTAGTCCCCTGTGGCACGCGAACACGTAGATC  
TTCTGCACCACGTCCGTGCATTCTTTGGTCATTCTTTTTACCGGAATCAGCCTTGAAAT  
GACGGTTATAGCGGAAATCCATCAAGGTACGTAAGCCTTCGTCTACCACGAAAACAACGTT  
ACCTCCACGTCCACCATCACCAACCCCAAGGACCGCCATTAGGGACATATTTTTACGGCGA  
AAGGCAACCATGCCATCGCCACCATTACCAGCCTTGACCTTAATCTTGGCTGTATCTAAAA  
ACAT

>1647\_Intergenic\_Contig\_17

TTATTTCAATTTATCTGCTTCATAGGTGTGAACAAGCTCAAGACCTGCAAAGTTCTGCTGGC  
GGAGGGCTTCATAAACAATCATGCATACGGTATTCGAAACATTGAGGCTGCGAACGTGTTCC  
ATCGTTTCATAGGAATACGGAGAGCCTTCTCAGGATGGTCTCGCATAAAGTCTCGGGCAA  
GCCCTTGTCTTCACGTCCAAAGAGAAAATAATGGTCTTCGTCAAGTGCATAAATCCACCTCA  
GAATACACTTTTCTCAGCAAATTTGAAATCAGATAGACTTGTCTTTTTCATCTGAGACATGAA  
ATCTTCCAAGCTGTCATAAAAATAAATCTCAAGCTTATCCCAGTAATCCAACCCAGCCCGCT  
TCATCTTTTCGGTTCGTCATGGGAAAGCCCATTGGTTAATGATGTGGAGGGGAGAATTGGT  
CGCAGCGCAAGTACGCGCAATGTTACCTGTATTTTGTGGAATCTGAGGCTCGAATAATACA  
ATGTGATTTGTCATGACGGGTTTCTTTTATCATTGCAAAAAAATAGCCCACTGCCCGGAG  
TCAAGCTCAGCAAACAGCGTGGTTAAGGCGTCGTTAACTTACCTCACAACAGGTTTGAAGT  
AAATCAGCGAAACTACTTCTTAGTATAACACTTTTTCAGAATCATTGTCAATAGAAACGACTT  
GATTTTTTTACTTTTTTTGATGATATTTTCATGTTTGGTCATTCTTTTCTGAAAAGGTATGGTA

AAAGAGCCAAATCACTTCAAATCAGAGACATTGTTATAGAAGTTAAGCAAATGTATCTTCAA  
AACTTGAAAAAGCCTTTCTTCCCCTAAAAATCGCCTTAGAAAGTGCATTTTTTGCTAAAAAA  
GGGTATGATAGTTACATCATGAAAAAGTAG

>HA06\_Intergenic\_Contig\_17

TTATTTCAATTTATCTGCTTCATAGGTGTGAACAAGCTCAAGACCTGCAAAGTTCTGCTGGC  
GGAGGGCTTCATAAACAATCATGCATACGGTATTTCGAAACATTGAGGCTGCGAACGTGTTC  
ATCGTTCATAGGAATACGGAGAGCCTTCTCAGGATGGTCTCGCATAAAGTCCTCGGGCAA  
GCCCTTGTCTTCACGTCCAAAGAGAAAATAATGGTCTTCGTCAGTCGATAAATCCACCTCA  
GAATACACTTTCTCAGCAAATTTGAAATCAGATAGACTTGTCTTTTCATCTGAGACATGAA  
ATCTTCCAAGCTGTCATAAAAATAAATCTCAAGCTTATCCCAGTAATCCAAACCAGCCCGCT  
TCATCTTTCGGTTCGTCATGGGAAAGCCCATTGGTTTAAATGATGTGGAGGGGAGAATTGGT  
CGCAGCGCAAGTACGCGCAATGTTACCTGTATTTTGTGGAATCTGAGGCTCGAATAATACA  
ATGTGATTTGTCATGACGGGTTTCTTTTATCATTGCAAAAAAATAGCCACACTGCCCGGCG  
TCAAGCTCAGCAAACAGCGTGGTTAAGGCGTCGTTAACTTACCTCACAACAGGTTTGAAGT  
AAATCAGCGAAACTACTTCCTTAGTATAACACTTTCAGAATCATTGTCAATAGAAACGACTT  
GATTTTTTTACTTTTTTTGATGATATTTTCATGTTTGGTCATTCCTTTCTGAAAAGGTATGGTA  
AAAGAGCCAAATCACTTCAAATCAGAGACATTGTTATAGAAGTTAAGCAAATGTATCTTCAA  
AACTTGAAAAAGCCTTTCTTCCCCTAAAAATCGCCTTAGAAAGTGCATTTTTTGCTAAAAAA  
GGGTATGATAGTTACATCATGAAAAAGTAG

***S. oralis* 1648/RA08**

>1648\_cdsA

MTKDLQKRTLFAVLALAIPLVLFAGGLLLQIGIGLLAMLGVHELLHMKGLKTMIEGALTLFATFA  
LTVPLENYLTFLPVDGNVVAYSVLITIMLGTTVFSKNYTIEDAAFPIAVSFYVGFNFNALLDARVA  
GFDKVLALLFIVWATDSAAYLTGMNFGKHKLAPRVSPNKSIEGFVGGILGAVLITVIFMLVDSTVA  
LPYGIYRMSLFAAFFSVAGQFGDLIESAAKRHFVGVKDSGKFIPIGHGGVLDLRFDSMLIVFPMMHL  
FGLF

>HA08\_cdsA

MTKDLQKRTLFAVLALAIPLVLFAGGLLLQIGIGLLAMLGVHELLHMKGLKTMIEGALTLFATFA  
LTVPLENYLTFLPVDGNVVAYSVLITIMLGTTVFSKNYTIEDAAFPIAVSFYVGFNFNALLDARVA  
GFDKVLALLFIVWATDSAAYLTGMNFGKHKLAPRVSPNKSIEGFVGGILGAVLITVIFMLVDSTVA  
LPYGIYRMSLFAAFFSVAGQFGDLIESAAKRHFVGVKDSGKFIPIGHGGVLDLRFDSMLIVFPMMHL  
FGLF

>1648\_ppGpp\_synthetase

MPKEVNLTGDQVVALTKEYLTKEDVAFVQKALIYAVDCHSGQFRKSGEPYIIHPIQVAGILAKLKL  
DAVTVACGFLHDVVEDTDATLDDLEREFQHDVRIIVDGVTKLGKVEYKSLEEQLAENHRKMLM  
AMSEDIRVILVKLSDRLHNMRLLKHLRKDKQERISRETMEIYAPLAHRLGISSVKWELEDLSFRY  
LNPTEFYKITHMMKEKRREREALVDEVVTKLEDYATERNLKGKIYGRPKHIYSIYRKMQDKKKR  
FEEIYDLIAIRCILDTSQSDVYAMLGYVHELWKPMPGRFKDYIANRKANGYQSIHTTVYGPKGPIE  
FQIRTKEMHEVAEYGVAAHWAYKKGKIGQVNSKESAIKMNWIKEMMELQDQADDAKEFVDSV  
KENYLAEEIYVFTPDGAVRSLPKDSGPIDFAYEIHTKVGEKATGAKVNGRMVPLTTKLKTGDQV



EIITNPNSFGPSRDWLNMVKTSKARNKIRQFFKNQDKELSVNKGREMLMAQFQENGYVANKF  
MDKRHMDEVLQKTSYKTEEALYAAIGFGEIGAITVFNRLTEKERREEERAKAKAEAEELVKGGE  
VKVENKETLKVKHEGGVIEGASGLLVRIAKCCNPVPGDDIVGYITKGRGVAIHRVDCMNLRAQ  
ENYEQRLLDVEWEDQFSSKEYTAHIDIYGLNRTGLLNDVLQVLSNTTKNISTVNAQPTKDMKFA  
NIHVSFGISNLSTLTTVVDKIKSVPEVYAVKRTNG

>HA08\_ppGpp\_synthetase

MPKEVNLTGDQVVALTKEYLTKEDVAFVQKALYAVDCHSGQFRKSGEPYIIHPIQVAGILAKLKL  
DAVTVACGFLHDVVEDTDATLDDLEREFQHDVRIIVDGVTKLGKVEYKSLEEQLAENHRKMLM  
AMSEDIRVILVKLSDRLHNMRTLKHLRKDKQERISRETMEIYAPLAHRLGISSVKWELEDLSFRY  
LNPTFEYKITHMMKEKRREREALVDEVVTKLEDYATERNLKGKIYGRPKHIYSIYRKMQDKKKR  
FEEIYDLIAIRCILDTSQSDVYAMLGYVHELWKPMMPGRFKDYIANRKANGYQSIHTTVYGPKGPIE  
FQIRTKEMHEVAEYGVAAHWAYKKGKIGQVNSKESAIKMNWIKEMMELQDQADDAKEFVDSV  
KENYLAEEIYVFTP DGAVRSLPKDSGPIDFAYEIHTKVGEKATGAKVNGRMVPLTTKLKTGDQV  
EIITNPNSFGPSRDWLNMVKTSKARNKIRQFFKNQDKELSVNKGREMLMAQFQENGYVANKF  
MDKRHMDEVLQKTSYKTEEALYAAIGFGEIGAITVFNRLTEKERREEERAKAKAEAEELVKGGE  
VKVENKETLKVKHEGGVIEGASGLLVRIAKCCNPVPGDDIVGYITKGRGVAIHRVDCMNLRAQ  
ENYEQRLLDVEWEDQFSSKEYTAHIDIYGLNRTGLLNDVLQVLSNTTKNISTGNAQPTKDMKFA  
NIHVSFGISNLSTLTTVVDKIKSVPEVYAVKRTNG

>1648\_Ribosomal\_SSU\_MTase

VTKVETARSLALAVLEDVLMNQAYSNIALNKHLKGSQSVADKGLVTEIVYGTVARKLTLEWYLS  
HFIEDRDKLDNWLYVLLLLSAYQLRYLKDIPNHAVVNEAVELAKARKKGSEKLVNAVLRRLREG  
WPDIDSIKRNKRDSIAYSLPVWLVS KLKEEYGEERAQAIFESLLVRNKASIRVTDLSRKEEIKAL  
LEATDSPLVATGLVKEHGHFAGHDLFADGAI IQDESSQLVAPTLDLQGDERVL DACAAPGGKT  
AHIASYLTTGQVTALDLYDHKLDLIQENAERLGVADRVQTQKLDARKVHEFFGRDSFDKILVDA  
PCSGIGLLRRKPDIKYNKETADFTSLQEIQLEILGSVCQTLRKGGIITYSTCTIVSEENFQVVEAFL  
ESHPEFEQVKLEHECKDILKDG CILITPELYGSDGFFISQFRKISE

>HA08\_Ribosomal\_SSU\_MTase

VTKVETARSLALAVLEDVLMNQAYSNIALNKHLKGSQSVADKGLVTEIVYGTVARKLTLEWYLS  
HFIEDRDKLDNWLYVLLLLSAYQLRYLKDIPNHAVVNEAVELAKARKKGSEKLVNAVLRRLREG  
WPDIDSIKRNKRDSIAYSLPFWLVS KLKEEYGEERAQAIFESLLVRNKASIRVTDLSRKEEIKAL  
LEATDSPLVATGLVKEHGHFAGHDLFADGAI IQDESSQLVAPTLDLQGDERVL DACAAPGGKT  
AHIASYLTTGQVTALDLYDHKLDLIQENAERLGVADRVQTQKLDARKVHEFFGRDSFDKILVDA  
PCSGIGLLRRKPDIKYNKETADFTSLQEIQLEILGSVCQTLRKGGIITYSTCTIVSEENFQVVEAFL  
ESHPEFEQVKLEHECKDILKDG CILITPELYGSDGFFISQFRKISE

>1648\_Helicase\_PriA

MAIAKIIVNVPLMQTDQPYSYKVP EEFIDMLEVGM RVHVPFGKGNRLIQGIVLGLESQSDEEVAD  
QNLKEIAEVLDFSPVLTQEQLWLA EELRKSVFSYKISILKAMLPGLNSSYDKILYPLEGLSQADR  
ERLFGSEDSLAFSSLDLAKQAEMMRLTRKGLLRLEYQAVDQKKVKTQSWYEVDATQLEKIEISA  
RAKKKAELRDYLLSHPKSAPLASLLESYSREQVNFVEQGAVSIVQKEVQRSAAAYFEGIEASQP  
LELNPEQRKARDAVVSAIGSQPPFLLQGITGSGKTEVYLLQIIQGALDKGKTAILLVPEISLTPQM  
TERFVARFGEKVAILHSGLSNGEKYDEWRKVERGDAQVVVGARSAIFAPLKNLGVMIIDEEHEA  
SYKQDSNPRYHAREVAILRAQYNQAALVLGSATPSLESRARAGKGVYQHLRLTQRANPLATIP  
EVQVIDFRDYIGQNETSNFT PPLLEAIQDRLDKKEQVVLMLNRRGYSSFVMCRECGTVDSCPN

CDISLTLHMDTKTMNCHYCGFSKGIPHVCPNCQSR SIRYYGTGTQKAYDELVELFPQARILRMD  
VDTRKKGSHQALLEQFGRGEADILLGTQMIAKGLDFPNVTLVGVLNADTALNLPDFRSSERTF  
QLLTQVAGRAGRAEKTGQVLIQSYNPEHYAIRFAKDQDYEGFYAYEMSIRRQLGYPPYYFTIGI  
TLSHKKEEEVVKRAYEVMGILRSGLSETSKILGPTPKPIARTHNLHYHYQILIKYRLEDELGPTLNR  
VLALTQERENSELRLSIDHEPQQFL

>HA08\_Helicase\_PriA

MAIAKIIVNVPLMQTDQPYSYKVPFAFIDMLEVGMRVHVPFGKGNRLIQGIVLGLESQSDEEVAD  
QNLKEIAEVLDVDFSPVLTQEQLWLAEEELRKS VFSYKISILKAMLPGFLNSSYDKILYPLEGLSQADR  
ERLFGSEDSLAFSSLDLAKQAEMMRLTRKGLLRLEYQAVDQKKVKTQSWYEVDATQLEKIEISA  
RAKKKAELRDYLLSHPKSAPLASLLESYSREQVNFVEQGA VSIVQKEVQRSAA YFEGIEASQP  
LELNPEQRKARDAVVSAIGSQPPFLLQGITGSGKTEVYLQIIQGALDKGKTAILLVEISLTPQM  
TERFVARFGEKVAILHSGLSNGEKYDEWRKVERGDAQVVVGARSAIFAPLKNLGVMIIDEEHEA  
SYKQDSNPRYHAREVAILRAQYNQAALVLGSATPSLESRARAGKGVYQHLRLTQRANPLATIP  
EVQVIDFRDYIGQNETSNFTPPLLEAIQDRLDKKEQVVLMLNRRGYSSFVMCRECGTV DSCP  
CDISLTLHMDTKTMNCHYCGFSKGIPHVCPNCQSR SIRYYGTGTQKAYDELVELFPQARILRMD  
VDTRKKGSHQALLEQFGRGEADILLGTQMIAKGLDFPNVTLVGVLNADTALNLPDFRSSERTF  
QLLTQVAGRAGRAEKTGQVLIQSYNPEHYAIRFAKDQDYEGFYAYEMSIRRQLGYPPYYFTIGI  
TLSHKKEEEVVKRAYEVMGILRSGLSETSKILGPTPKPIARTHNLHYHYQILIKYRLEDELGPTLNR  
VLALTQERENSELRLSIDHEPQQFL
